# Supplementary material for: Dendrobium Officinale Polysaccharides Protect against MNNG-Induced PLGC in Rats via Activating the NRF2 and Antioxidant Enzymes HO-1 and NQO-1
Source: Hindawi journal article supplement (doi:10.1155/2019/9310245), 2019-06-04
Supplement: f1 [file 9310245.f1.pdf]

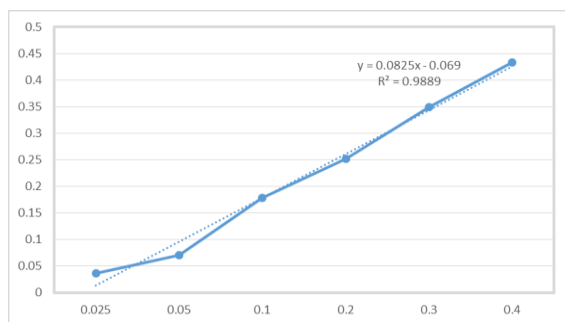

| Sample   | Content of DOP |
|----------|----------------|
| Sample 1 | 76.59%         |
| Sample 2 | 86.28%         |
| Sample 3 | 86.41%         |

FIGURE S1 Standard curve of glucose and the content of DOP

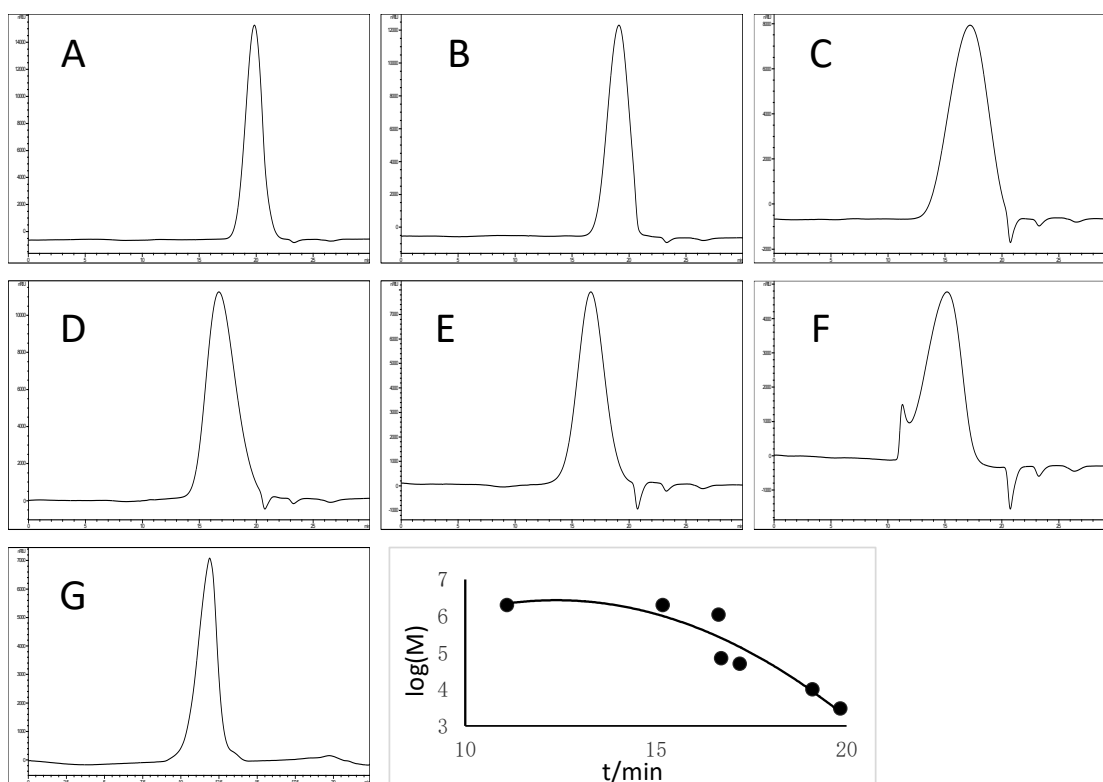

FIGURE S2 The chromatogram of different molecular weight of dextran and the Standard curve of dextran (A.3000; B.1 million C.5million; D.7 million; E.11 million; F.20 million G.200 million;)

Table S1 RT-PCR primer sequences and annealing temperature

| Gene           | Forward primer         | Reverse primer           |
|----------------|------------------------|--------------------------|
| <i>β-actin</i> | CCCATCTATGAGGGTTACGC   | TTTAATGTCAGCAGGATTTC     |
| <i>KAEP1</i>   | CTGCATCCACCACAGCAGCGT  | GTGCAGCACACAGACCCCGGC    |
| <i>NRF2</i>    | GCCCACATTCCCAAACAAGAT  | CCAGAGAGCTATTGAGGGACTG   |
| <i>HO-1</i>    | AAGAGGCTAAGACCGCCTTC   | GCATAAATCCCACTGCCAC      |
| <i>NQO-1</i>   | TCACCACTCTACTTTGCTCCAA | TTTTCTGCTCCTTGAACCTC     |
| <i>Gclc</i>    | CCTCCTCTCCAAACTCAGATA  | CCACAAATACCACATAGGCAGA   |
| <i>Gclm</i>    | GCCACCAGATTTGACTGCCTTT | CAGGGATGCTTTCTTGAAGAGCTT |
